# Supplementary material for: Sector analysis and predictive modelling reveal iterative shoot-like development in fern fronds
Source: Oxford University Press journal article supplement (doi:10.1242/dev.065888), 2011-06-08
Supplement: dev065888tables1.pdf [file dev065888tables1.pdf]

**Table S1. Frequency of sector sizes found on 114 randomly selected fronds**

| Size of sector (number of pinnae) | Frequency |
|-----------------------------------|-----------|
| 1                                 | 124       |
| 2                                 | 37        |
| 3                                 | 25        |
| 4                                 | 3         |
| 5                                 | 2         |
| 6                                 | 0         |
| 7                                 | 0         |
| 8                                 | 0         |
| 9                                 | 0         |
| 10                                | 0         |
